# Supplementary material for: Dietary Liberalization in Tetrahydrobiopterin-Treated PKU Patients: Does It Improve Outcomes?
Source: MDPI journal article supplement (doi:10.3390/nu14183874), 2022-09-19
Supplement: s1 [file s1]

## Supplementary file S4 – Forest plots of primary meta-analyses

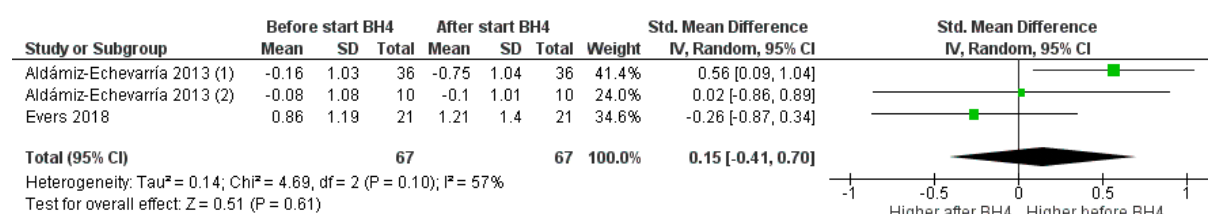

Figure S4.1. Forest plot of the primary within-subject meta-analysis for weight.

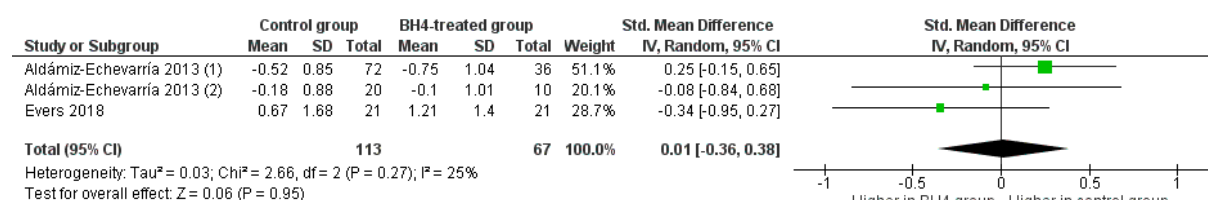

Figure S4.2. Forest plot of the primary between-subject meta-analysis for weight.

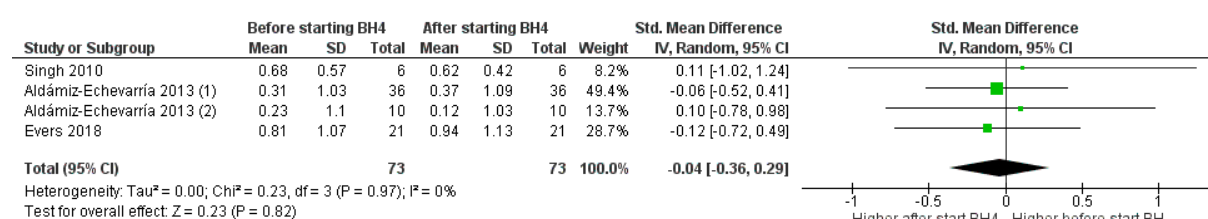

Figure S4.3. Forest plot of the primary within-subject meta-analysis for BMI.

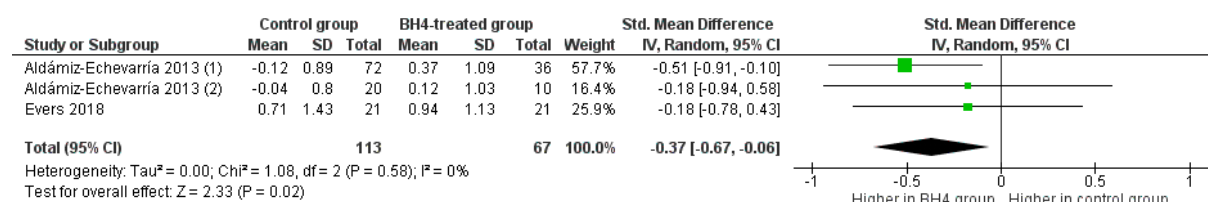

Figure S4.4. Forest plot of the primary between-subject meta-analysis for BMI.

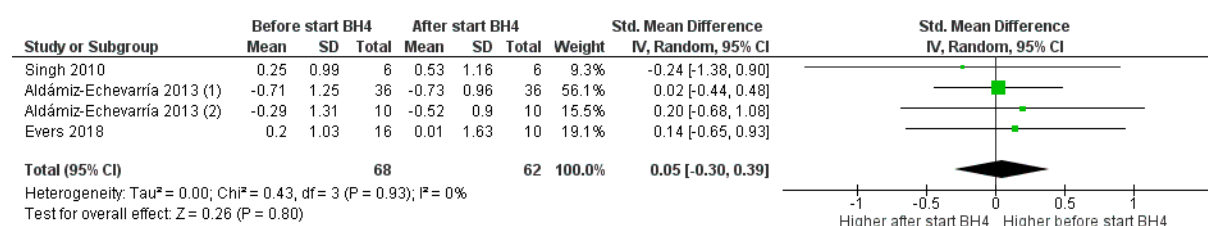

Figure S4.5. Forest plot of the primary within-subject meta-analysis for height.

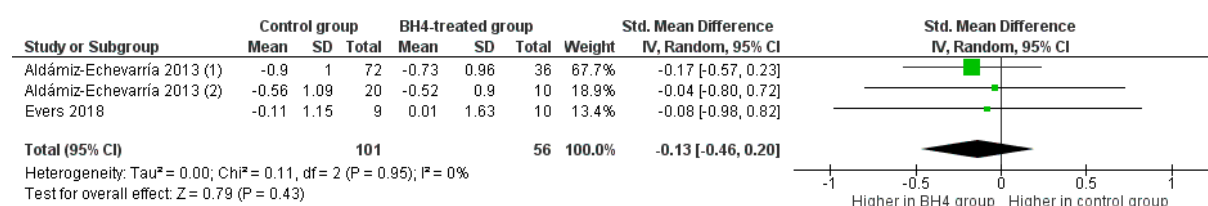

Figure S4.6. Forest plot of the primary between-subject meta-analysis for height.

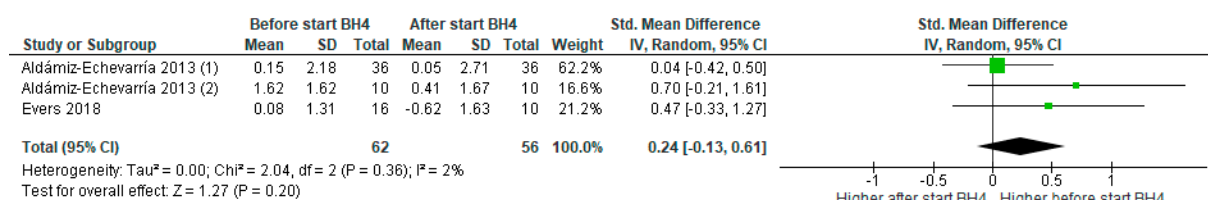

**Figure S4.7.** Forest plot of the primary within-subject meta-analysis for growth velocity.

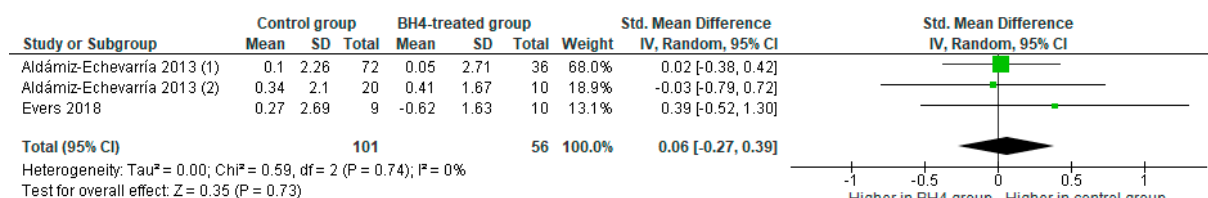

**Figure S4.8.** Forest plot of the primary between-subject meta-analysis for growth velocity.

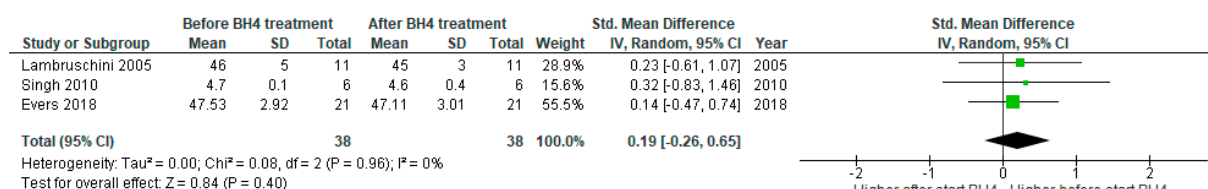

**Figure S4.9.** Forest plot of the primary within-subject meta-analysis for blood albumin concentrations.

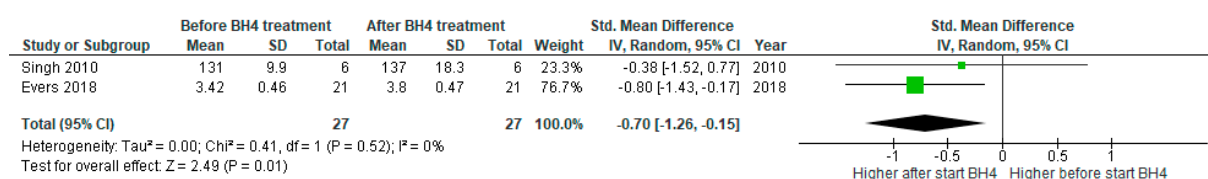

**Figure S4.10.** Forest plot of the primary within-subject meta-analysis for blood cholesterol concentrations.

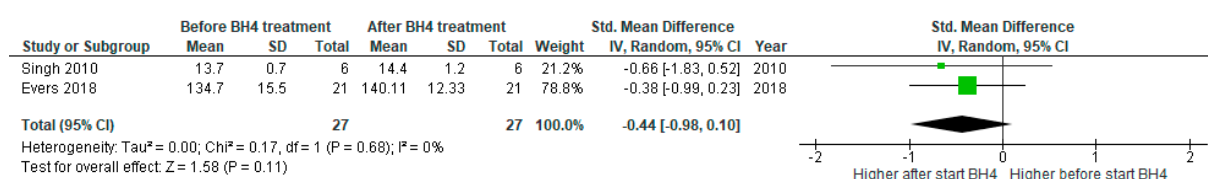

**Figure S4.11.** Forest plot of the primary within-subject meta-analysis for blood haemoglobin concentrations.

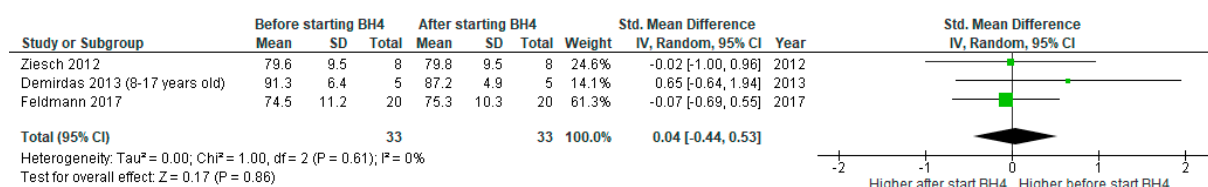

**Figure S4.12.** Forest plot of the primary within-subject meta-analysis for generic health-related quality of life – patient report.

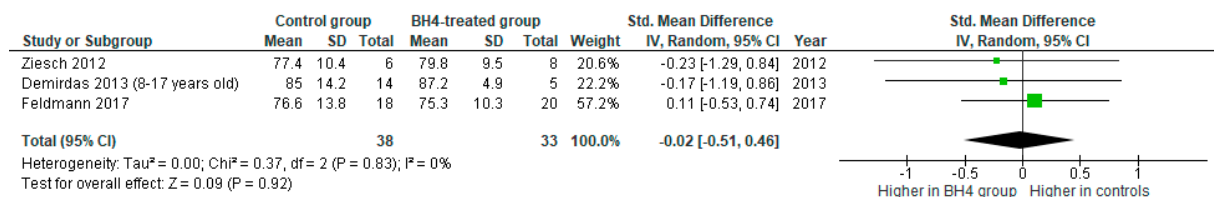

**Figure S4.13.** Forest plot of the primary between-subject meta-analysis for generic health-related quality of life – patient report.

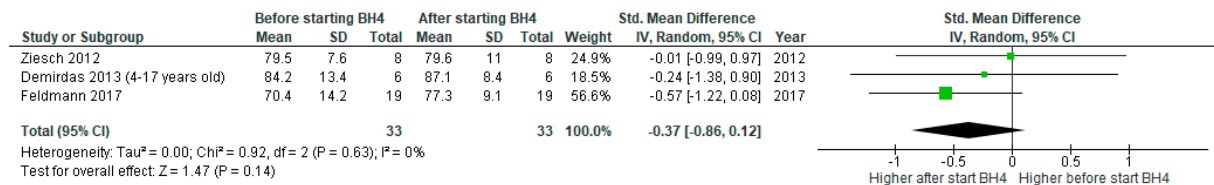

**Figure S4.14.** Forest plot of the primary within-subject meta-analysis for generic health-related quality of life – proxy report.

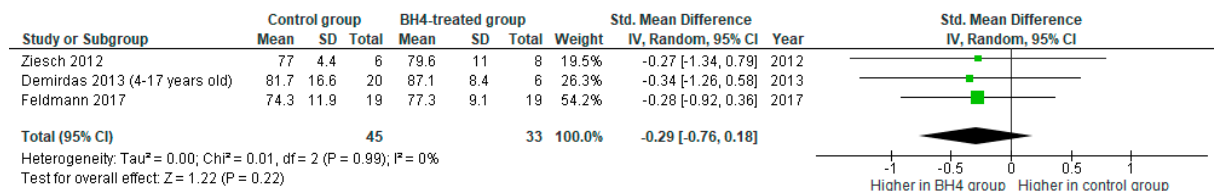

**Figure S4.15.** Forest plot of the primary between-subject meta-analysis for generic health-related quality of life – proxy report.
