# Supplementary material for: Dietary Liberalization in Tetrahydrobiopterin-Treated PKU Patients: Does It Improve Outcomes?
Source: MDPI journal article supplement (doi:10.3390/nu14183874), 2022-09-19
Supplement: s1 [file s1]

| Study          | Main findings                                                                                                                                                                                                                                                                                                                                                                                                                                                                                                                                                                                   | Cohort characteristics |                                        |                         |                          |                    |             |
|----------------|-------------------------------------------------------------------------------------------------------------------------------------------------------------------------------------------------------------------------------------------------------------------------------------------------------------------------------------------------------------------------------------------------------------------------------------------------------------------------------------------------------------------------------------------------------------------------------------------------|------------------------|----------------------------------------|-------------------------|--------------------------|--------------------|-------------|
|                |                                                                                                                                                                                                                                                                                                                                                                                                                                                                                                                                                                                                 | Number of patients     | Age at baseline (years)                | Follow-up time (months) | Blood Phe concentrations |                    |             |
|                |                                                                                                                                                                                                                                                                                                                                                                                                                                                                                                                                                                                                 |                        |                                        |                         | Baseline (μmol/l)        | Follow-up (μmol/l) | Change      |
|                | <b>Neuro-imaging</b>                                                                                                                                                                                                                                                                                                                                                                                                                                                                                                                                                                            |                        |                                        |                         |                          |                    |             |
| Christ 2013    | Activation changed significantly in one out of 15 regions of interest.                                                                                                                                                                                                                                                                                                                                                                                                                                                                                                                          | 12                     | 23.6 ± 8.8                             | 6                       | 681                      | 582                | -15%        |
| White 2013     | Mean diffusivity improved in two out of 10 regions of interest.                                                                                                                                                                                                                                                                                                                                                                                                                                                                                                                                 | 12                     | 18.2 ± 9.6                             | 6                       | 653                      | 409                | -37%        |
| Clocks in 2021 | White matter integrity improved significantly in 11 out of 14 tracts.                                                                                                                                                                                                                                                                                                                                                                                                                                                                                                                           | 8                      | 22.5 ± 10.1                            | 6.4 <sup>a</sup>        | 693                      | 375                | -46%        |
|                | <b>IQ</b>                                                                                                                                                                                                                                                                                                                                                                                                                                                                                                                                                                                       |                        |                                        |                         |                          |                    |             |
| White 2013     | IQ did not significantly change after starting BH <sub>4</sub> treatment, and was not significantly different compared to controls.                                                                                                                                                                                                                                                                                                                                                                                                                                                             | 12                     | 18.2 ± 9.6                             | 6                       | 653                      | 409                | -37%        |
|                | <b>Executive functioning</b>                                                                                                                                                                                                                                                                                                                                                                                                                                                                                                                                                                    |                        |                                        |                         |                          |                    |             |
| Christ 2013    | Working memory significantly improved after starting BH <sub>4</sub> treatment. Outcome was worse than controls at baseline, but there was no significant difference anymore after starting BH <sub>4</sub> treatment.                                                                                                                                                                                                                                                                                                                                                                          | 12                     | 23.6 ± 8.8                             | 6                       | 681                      | 582                | -18%        |
| White 2013     | Executive abilities did not significantly change after starting BH <sub>4</sub> treatment, and were not significantly different compared to controls.                                                                                                                                                                                                                                                                                                                                                                                                                                           | 12                     | 18.2 ± 9.6                             | 6                       | 653                      | 409                | -37%        |
| Burton 2015    | - In patients < 18 years, global executive functioning as well as one of the two subscales (metacognition index) was significantly better compared to controls.<br>- In patients > 18 years, global executive functioning and neither of the two subscales were significantly different compared to controls<br>- Improvement of global functioning was not significantly different compared to controls.                                                                                                                                                                                       | 61 / 57 <sup>b</sup>   | 19.6 ± 10.1 / 20.2 ± 10.1 <sup>b</sup> | 6 / 3 <sup>b</sup>      | 680 / 703                | 470 / 484          | -31% / -31% |
|                | <b>Mental health</b>                                                                                                                                                                                                                                                                                                                                                                                                                                                                                                                                                                            |                        |                                        |                         |                          |                    |             |
| Burton 2015    | - Total ADHD score did not significantly differ compared to controls. However, one of the two subscales (inattention) was significantly better compared to controls.<br>- In patients < 18 years, total ADHD score and one of the two subscales (inattention) were significantly better compared to controls.<br>- In patients > 18 years, total ADHD score and neither of the two subscales were significantly better compared to controls.<br>- Total ADHD score and the inattention subscale significantly decreased after starting BH <sub>4</sub> treatment relative to the placebo group. | 61 / 57 <sup>b</sup>   | 19.6 ± 10.1 / 20.2 ± 10.1 <sup>b</sup> | 6 / 3 <sup>b</sup>      | 680 / 703                | 470 / 484          | -31% / -31% |

**Table S9.1.** Summary of outcomes in studies that investigated the effects of lower blood Phe concentrations following BH<sub>4</sub> treatment. Change in dietary Phe was not reported in these studies. <sup>a</sup>Mean follow-up time (different follow-up times for different patients). <sup>b</sup>Results for two separate cohorts (BH<sub>4</sub> treatment for 26 weeks / BH<sub>4</sub> treatment for 13 weeks).
