# Supplementary material for: Dietary Liberalization in Tetrahydrobiopterin-Treated PKU Patients: Does It Improve Outcomes?
Source: MDPI journal article supplement (doi:10.3390/nu14183874), 2022-09-19
Supplement: s1 [file s1]

## Supplementary file S7 - Funnel plots of primary meta-analyses

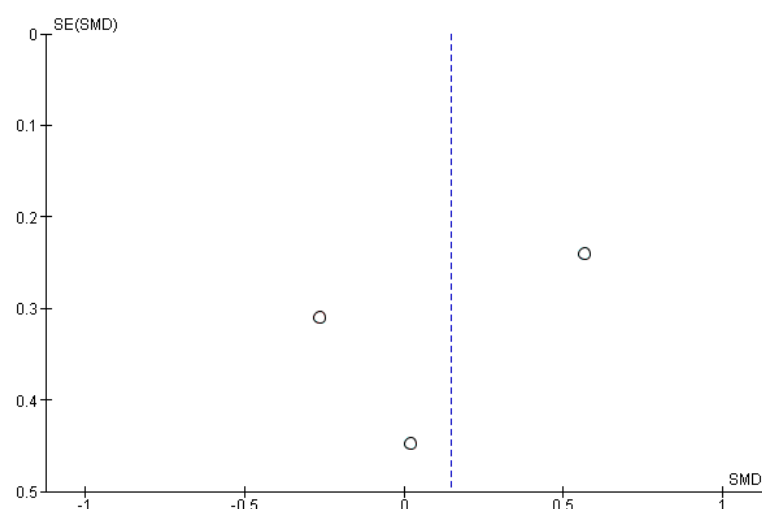

**Figure S7.1.** Funnel plot of the primary within-subject meta-analysis for weight.

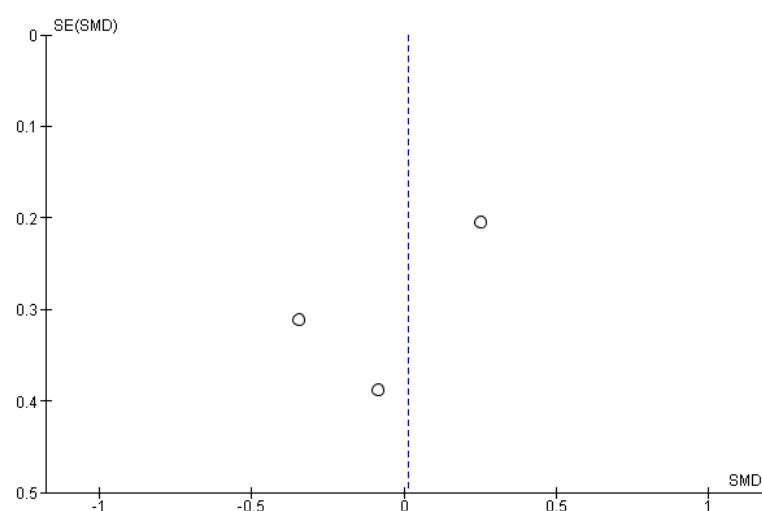

**Figure S7.2.** Funnel plot of the primary between-subject meta-analysis for weight.

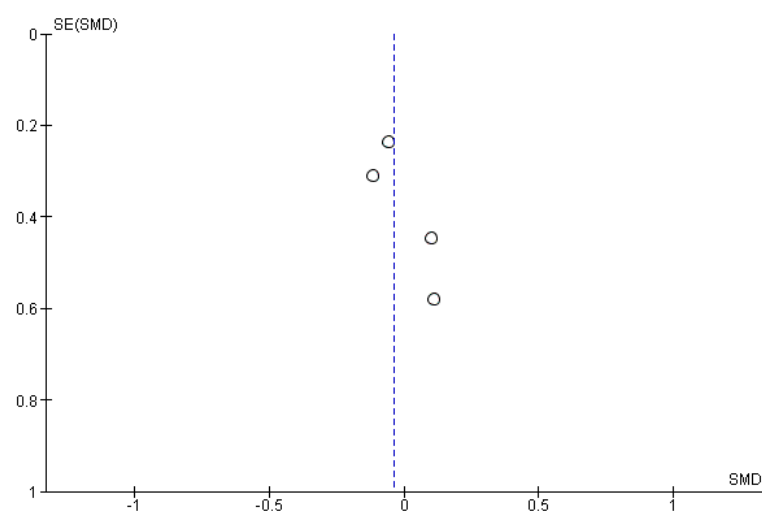

**Figure S7.3.** Funnel plot of the primary within-subject meta-analysis for BMI.

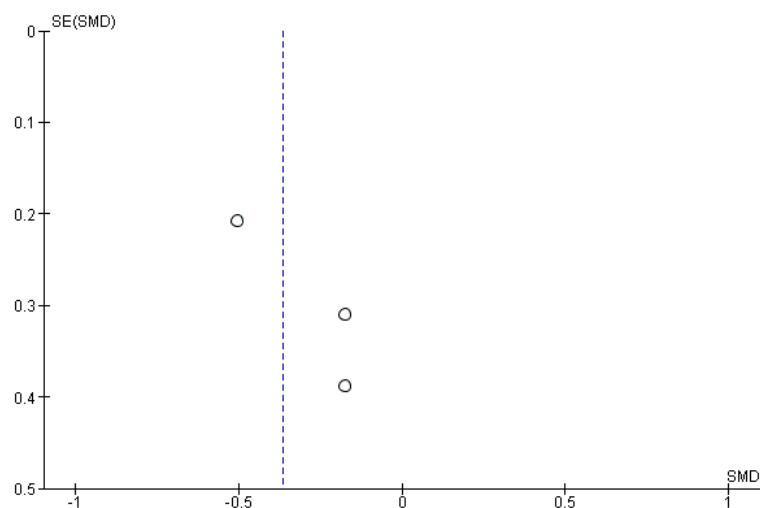

**Figure S7.4.** Funnel plot of the primary between-subject meta-analysis for BMI.

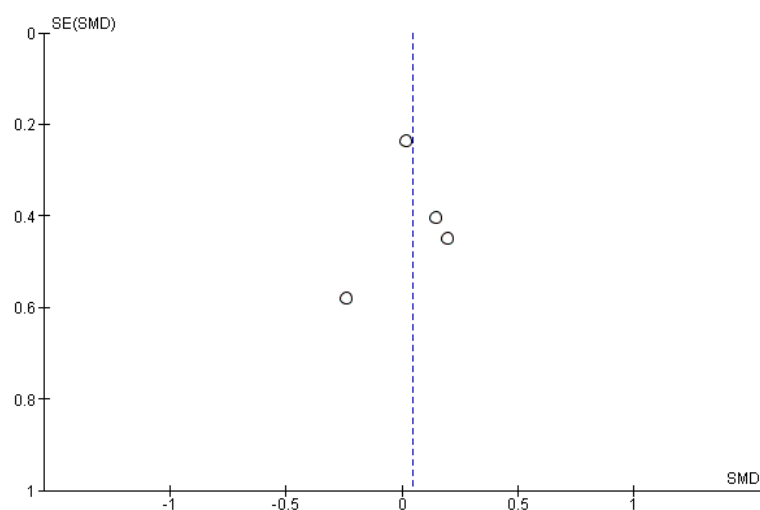

**Figure S7.5.** Funnel plot of the primary within-subject meta-analysis for height.

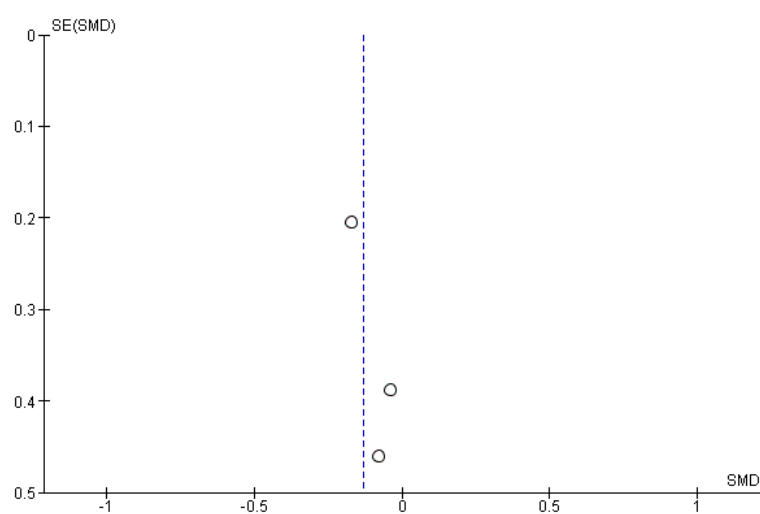

**Figure S7.6.** Funnel plot of the primary between-subject meta-analysis for height.

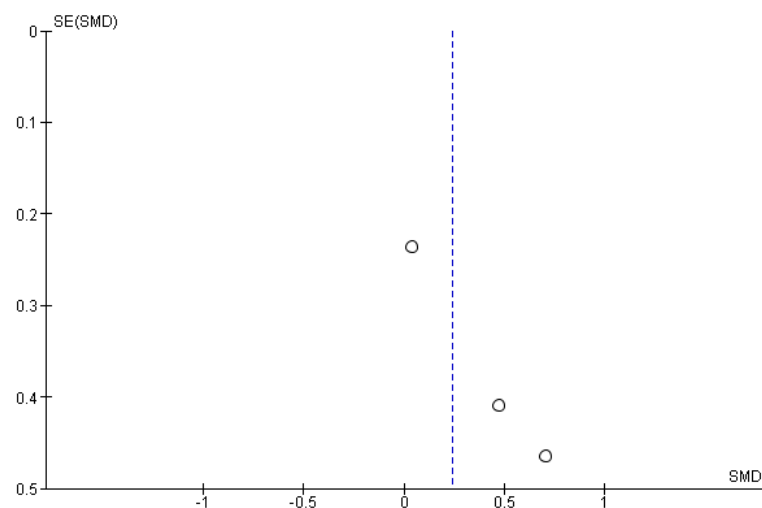

**Figure S7.7.** Funnel plot of the primary within-subject meta-analysis for growth velocity.

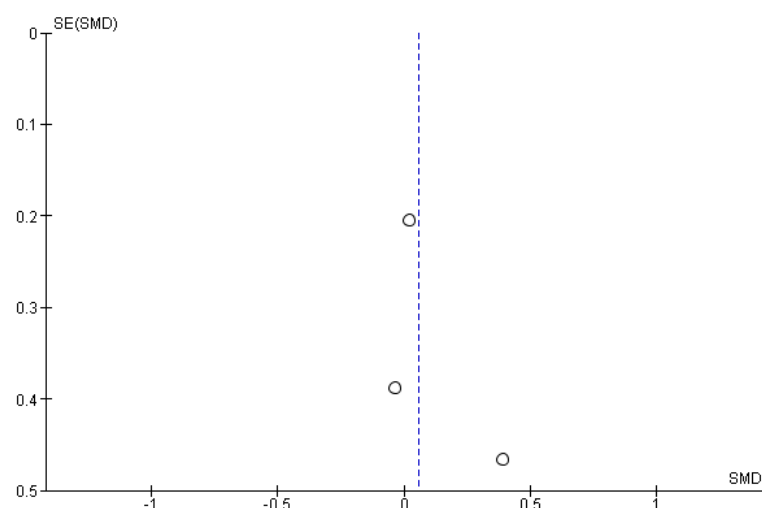

**Figure S7.8.** Funnel plot of the primary between-subject meta-analysis for growth velocity.

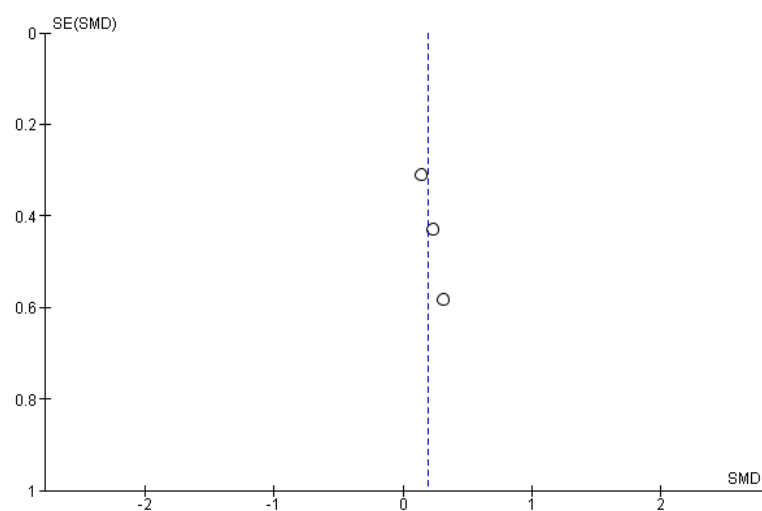

**Figure S7.9.** Funnel plot of the primary within-subject meta-analysis for blood albumin concentrations.

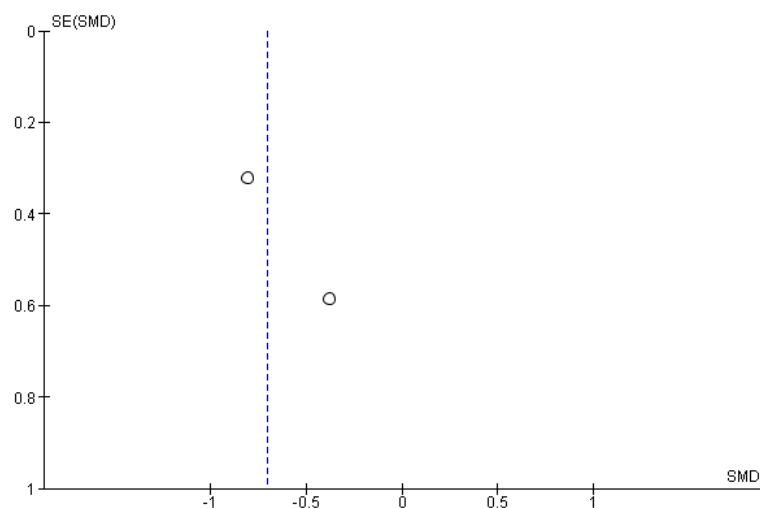

**Figure S7.10.** Funnel plot of the primary within-subject meta-analysis for blood cholesterol concentrations.

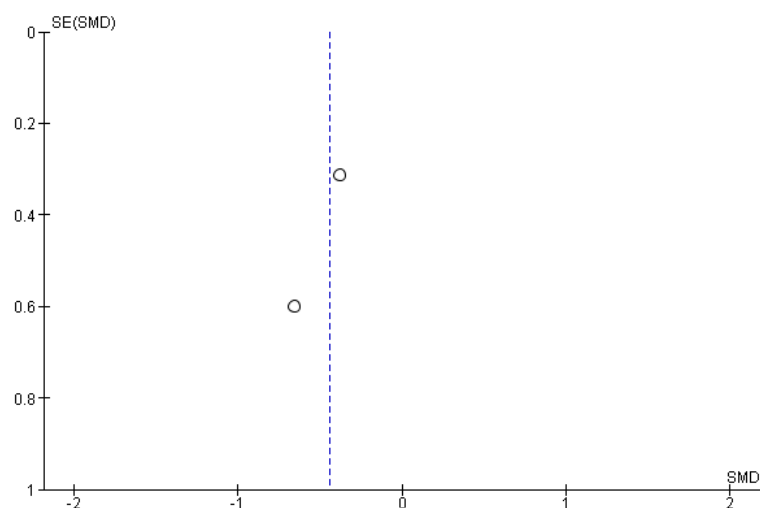

**Figure S7.11.** Funnel plot of the primary within-subject meta-analysis for blood haemoglobin concentrations.

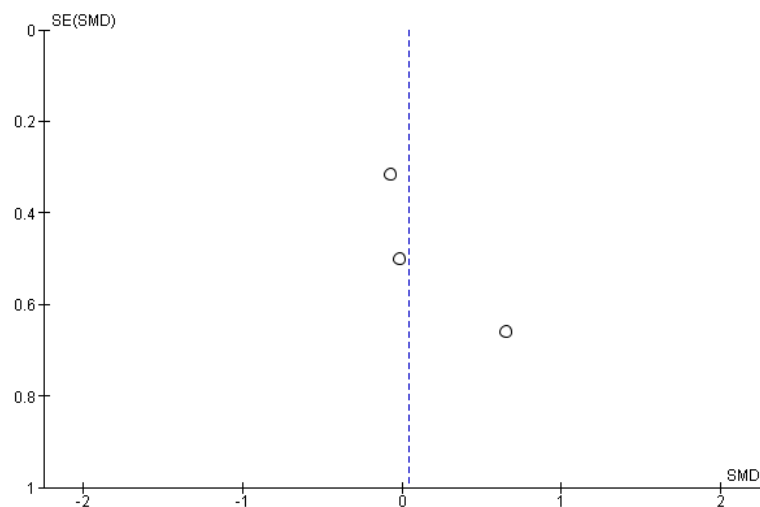

**Figure S7.12.** Funnel plot of the primary within-subject meta-analysis for generic health-related quality of life – patient report.

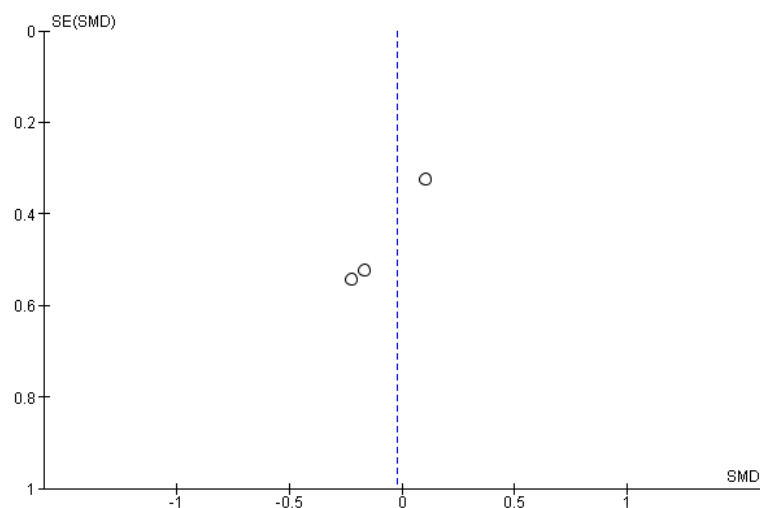

**Figure S7.13.** Funnel plot of the primary between-subject meta-analysis for generic health-related quality of life – patient report.

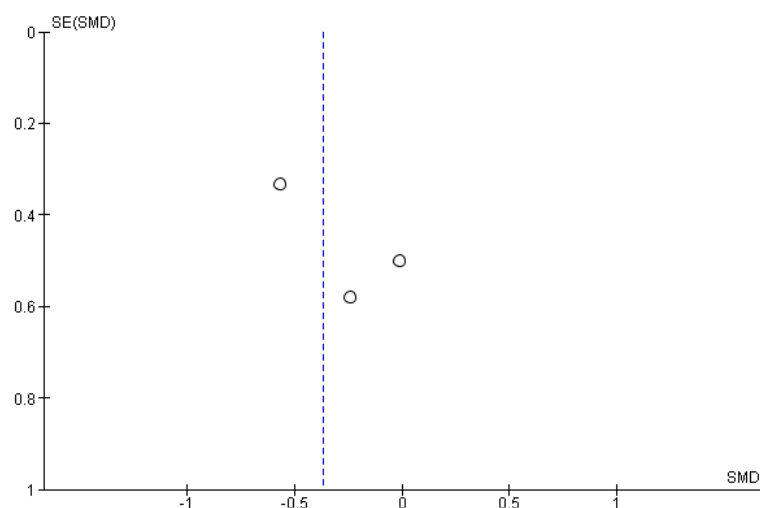

**Figure S7.14.** Funnel plot of the primary within-subject meta-analysis for generic health-related quality of life – proxy report.

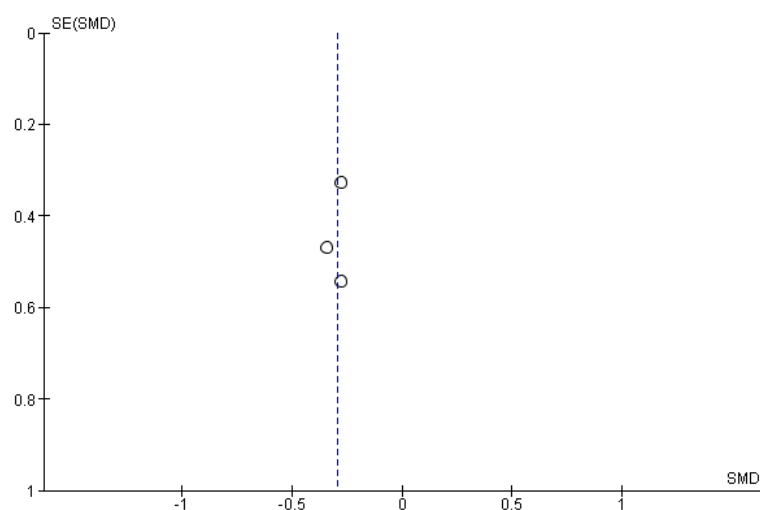

**Figure S7.15.** Funnel plot of the primary between-subject meta-analysis for generic health-related quality of life – proxy report.
