# Supplementary material for: Dietary Liberalization in Tetrahydrobiopterin-Treated PKU Patients: Does It Improve Outcomes?
Source: MDPI journal article supplement (doi:10.3390/nu14183874), 2022-09-19
Supplement: s1 [file s1]

## Supplementary file S3 - Overview of meta-analyses

| Parameter               |                 | Primary meta-analyses<br>(longest follow-up time per study) |                            |                            | Secondary meta-analyses                              |                            |                          |                                                    |                     |                          |       |
|-------------------------|-----------------|-------------------------------------------------------------|----------------------------|----------------------------|------------------------------------------------------|----------------------------|--------------------------|----------------------------------------------------|---------------------|--------------------------|-------|
|                         |                 |                                                             |                            |                            | Short-term effects<br>(≤ 6 months of follow up time) |                            |                          | Long-term effects<br>(≥ 5 years of follow up time) |                     |                          |       |
|                         |                 | Overall                                                     | Stratified by cohort age   |                            |                                                      | Overall                    | Stratified by cohort age |                                                    | Overall             | Stratified by cohort age |       |
|                         |                 |                                                             | < 12                       | 12-18                      | > 18                                                 |                            | < 12                     | 12-18                                              |                     | < 12                     | 12-18 |
| Weight                  | Within-subject  | <i>p</i> = 0.61                                             | <i>p</i> = 0.08 (2)        | <i>p</i> = 0.39 (1)        | <i>p</i> = 0.58                                      | <i>p</i> = 0.58 (2)        |                          | <i>p</i> = 0.50                                    | <i>p</i> = 0.97 (1) | <i>p</i> = 0.39 (1)      |       |
|                         | Between-subject | <i>p</i> = 0.95                                             | <i>p</i> = 0.33 (2)        | <i>p</i> = 0.27 (1)        | <b><i>p</i> = 0.01</b>                               | <b><i>p</i> = 0.01 (2)</b> |                          | <i>p</i> = 0.32                                    | <i>p</i> = 0.83 (1) | <i>p</i> = 0.27 (1)      |       |
| BMI                     | Within-subject  | <i>p</i> = 0.82                                             | <i>p</i> = 0.97 (2)        | <i>p</i> = 0.71 (1)        | <i>p</i> = 0.69                                      | <i>p</i> = 0.69 (3)        |                          | <i>p</i> = 0.85                                    | <i>p</i> = 0.83 (1) | <i>p</i> = 0.71 (1)      |       |
|                         | Between-subject | <b><i>p</i> = 0.02</b>                                      | <b><i>p</i> = 0.02 (2)</b> | <i>p</i> = 0.57 (1)        | <i>p</i> = 0.38                                      | <i>p</i> = 0.38 (2)        |                          | <i>p</i> = 0.47                                    | <i>p</i> = 0.65 (1) | <i>p</i> = 0.57 (1)      |       |
| Height                  | Within-subject  | <i>p</i> = 0.80                                             | <i>p</i> = 0.91 (3)        | <i>p</i> = 0.72 (1)        | <i>p</i> = 0.84                                      | <i>p</i> = 0.84 (3)        |                          | <i>p</i> = 0.58                                    | <i>p</i> = 0.66 (1) | <i>p</i> = 0.72 (1)      |       |
|                         | Between-subject | <i>p</i> = 0.43                                             | <i>p</i> = 0.43 (2)        | <i>p</i> = 0.86 (1)        | <i>p</i> = 0.57                                      | <i>p</i> = 0.57 (2)        |                          | <i>p</i> = 0.85                                    | <i>p</i> = 0.92 (1) | <i>p</i> = 0.86 (1)      |       |
| Growth velocity         | Within-subject  | <i>p</i> = 0.20                                             | <i>p</i> = 0.42 (2)        | <i>p</i> = 0.25 (1)        | <i>p</i> = 0.49                                      | <i>p</i> = 0.49 (2)        |                          | <i>p</i> = 0.06                                    | <i>p</i> = 0.13 (1) | <i>p</i> = 0.25 (1)      |       |
|                         | Between-subject | <i>p</i> = 0.73                                             | <i>p</i> = 0.96 (2)        | <i>p</i> = 0.40 (1)        | <i>p</i> = 0.77                                      | <i>p</i> = 0.77 (2)        |                          | <i>p</i> = 0.64                                    | <i>p</i> = 0.93 (1) | <i>p</i> = 0.40 (1)      |       |
| Albumin                 | Within-subject  | <i>p</i> = 0.40                                             | <i>p</i> = 0.58 (2)        | <i>p</i> = 0.65 (1)        |                                                      |                            |                          |                                                    |                     |                          |       |
| Cholesterol             | Within-subject  | <b><i>p</i> = 0.01</b>                                      | <i>p</i> = 0.52 (1)        | <b><i>p</i> = 0.01 (1)</b> |                                                      |                            |                          |                                                    |                     |                          |       |
| Haemoglobin             | Within-subject  | <i>p</i> = 0.11                                             | <i>p</i> = 0.27 (1)        | <i>p</i> = 0.22 (1)        |                                                      |                            |                          |                                                    |                     |                          |       |
| HR-QoL (patient-report) | Within-subject  | <i>p</i> = 0.86                                             | <i>p</i> = 0.97 (1)        | <i>p</i> = 0.83 (2)        | <i>p</i> = 0.83                                      | <i>p</i> = 0.97 (1)        | <i>p</i> = 0.82 (1)      |                                                    |                     |                          |       |
|                         | Between-subject | <i>p</i> = 0.92                                             | <i>p</i> = 0.68 (1)        | <i>p</i> = 0.92 (2)        | <i>p</i> = 0.95                                      | <i>p</i> = 0.68 (1)        | <i>p</i> = 0.75 (1)      |                                                    |                     |                          |       |
| HR-QoL (proxy-report)   | Within-subject  | <i>p</i> = 0.14                                             | <i>p</i> = 0.78 (2)        | <i>p</i> = 0.09 (1)        | <i>p</i> = 0.15                                      |                            |                          |                                                    |                     |                          |       |
|                         | Between-subject | <i>p</i> = 0.22                                             | <i>p</i> = 0.38 (2)        | <i>p</i> = 0.40 (1)        | <i>p</i> = 0.32                                      |                            |                          |                                                    |                     |                          |       |

**Table S3.1.** Overview of all meta-analyses performed in this systematic review. Results are given as  $p$ -values (number of cohorts). Stratifications were made according to mean cohort age in years. BMI, body mass index. HR-QoL, health-related quality of life. IQ, intelligent quotient.
