# Supplementary material for: Dietary Liberalization in Tetrahydrobiopterin-Treated PKU Patients: Does It Improve Outcomes?
Source: MDPI journal article supplement (doi:10.3390/nu14183874), 2022-09-19
Supplement: s1 [file s1]

## Supplementary file S6 - Risk of bias in individual studies

|                   | Study participation                                                               | Study attrition                                                                   | Prognostic factor measurement                                                     | Outcome measurement                                                               | Study confounding                                                                 | Statistical analysis and reporting                                                |
|-------------------|-----------------------------------------------------------------------------------|-----------------------------------------------------------------------------------|-----------------------------------------------------------------------------------|-----------------------------------------------------------------------------------|-----------------------------------------------------------------------------------|-----------------------------------------------------------------------------------|
| Lambruschini 2005 |  |  |  |  |  |  |
| Muntau 2021       |  |  |  |  |  |  |

**Table S6.1.** Risk of bias in individual studies for neurocognitive outcome, assessed by the Quality In Prognosis Studies (QUIPS) tool. Each possible area of bias was scored as low risk of bias (green), moderate risk of bias (orange) or high risk of bias (red).

|                         | Study participation                                                                 | Study attrition                                                                     | Prognostic factor measurement                                                       | Outcome measurement                                                                 | Study confounding                                                                   | Statistical analysis and reporting                                                  |
|-------------------------|-------------------------------------------------------------------------------------|-------------------------------------------------------------------------------------|-------------------------------------------------------------------------------------|-------------------------------------------------------------------------------------|-------------------------------------------------------------------------------------|-------------------------------------------------------------------------------------|
| Lambruschini 2005       |  |  |  |  |  |  |
| Singh 2010              |  |  |  |  |  |  |
| Aldámiz-Echevarría 2013 |  |  |  |  |  |  |
| Tansek 2016             |  |  |  |  |  |  |
| Scala 2015              |  |  |  |  |  |  |
| Evers 2018              |  |  |  |  |  |  |
| Muntau 2021             |  |  |  |  |  |  |

**Table S6.2.** Risk of bias in individual studies for anthropometric measurements, assessed by the Quality In Prognosis Studies (QUIPS) tool. Each possible area of bias was scored as low risk of bias (green), moderate risk of bias (orange) or high risk of bias (red).

|                   | Study participation                                                               | Study attrition                                                                   | Prognostic factor measurement                                                     | Outcome measurement                                                               | Study confounding                                                                 | Statistical analysis and reporting                                                |
|-------------------|-----------------------------------------------------------------------------------|-----------------------------------------------------------------------------------|-----------------------------------------------------------------------------------|-----------------------------------------------------------------------------------|-----------------------------------------------------------------------------------|-----------------------------------------------------------------------------------|
| Lambruschini 2005 |  |  |  |  |  |  |
| Singh 2010        |  |  |  |  |  |  |
| Tansek 2016       |  |  |  |  |  |  |
| Brantley 2018     |  |  |  |  |  |  |
| Evers 2018        |  |  |  |  |  |  |

**Table S6.3.** Risk of bias in individual studies for nutritional biomarkers, assessed by the Quality In Prognosis Studies (QUIPS) tool. Each possible area of bias was scored as low risk of bias (green), moderate risk of bias (orange) or high risk of bias (red).

|               | Study participation                                                                 | Study attrition                                                                     | Prognostic factor measurement                                                       | Outcome measurement                                                                 | Study confounding                                                                   | Statistical analysis and reporting                                                  |
|---------------|-------------------------------------------------------------------------------------|-------------------------------------------------------------------------------------|-------------------------------------------------------------------------------------|-------------------------------------------------------------------------------------|-------------------------------------------------------------------------------------|-------------------------------------------------------------------------------------|
| Ziesch 2012   |  |  |  |  |  |  |
| Demirdas 2013 |  |  |  |  |  |  |
| Douglas 2013  |  |  |  |  |  |  |
| Feldmann 2017 |  |  |  |  |  |  |

**Table S6.4.** Risk of bias in individual studies for quality of life, assessed by the Quality In Prognosis Studies (QUIPS) tool. Each possible area of bias was scored as low risk of bias (green), moderate risk of bias (orange) or high risk of bias (red).
