# Supplementary material for: Dietary Liberalization in Tetrahydrobiopterin-Treated PKU Patients: Does It Improve Outcomes?
Source: MDPI journal article supplement (doi:10.3390/nu14183874), 2022-09-19
Supplement: s1 [file s1]

## **Supplementary file S2 - Search strategy**

### **Databases**

Three databases were searched:

1. Pubmed
2. Cochrane
3. Embase (Ovid)

A combination was used of:

- Mesh terms (Medical Subject Headings) from Pubmed and Cochrane or Emtree terms from Embase
- Text-word search in title, abstract and author keywords.

### **Entry terms**

1. "phenylketonurias"[Mesh]
2. "phenylalanine hydroxylase/deficiency"[Mesh]
3. hyperphenylalaninaemia OR hyperphenylalaninemia
4. phenylalanine hydroxylase deficiency OR PAH deficiency
5. phenylketonuri\*
6. pku
7. 1 or 2 or 3 or 4 or 5 or 6
8. "sapropterin" [Supplementary Concept]
9. tetrahydrobiopterin
10. bh4 or bh 4
11. sapropterin
12. kuvan
13. 8 or 9 or 10 or 11 or 12
21. 7 and 13

For Embase the following publications types were excluded: books or chapter or conference abstract or editorial or note or tombstone

### Syntax of Mesh/Emtree terms per database

| Entry nr | Pubmed                                          | Cochrane                                                                                                           | Embase (OVID)                                                    |
|----------|-------------------------------------------------|--------------------------------------------------------------------------------------------------------------------|------------------------------------------------------------------|
| 1        | "phenylketonurias"[Mesh]                        | MeSH descriptor:<br>[phenylketonurias] explode<br>all trees                                                        | exp phenylketonuria/<br>exp hyperphenylalaninemia/               |
| 2        | "phenylalanine<br>hydroxylase/deficiency"[Mesh] | MeSH descriptor:<br>Phenylalanine Hydroxylase]<br>explode all trees and with<br>qualifier(s): [deficiency –<br>DF] | exp phenylalanine 4<br>monooxygenase/ and<br>deficiency.ti.ab.kw |
| 8        | "sapropterin" [Supplementary<br>Concept]        | /                                                                                                                  | exp tetrahydrobiopterin/<br>exp sapropterin/                     |

### Syntax of title, abstract and author keyword per database

| Entry nr      | Pubmed | Cochrane  | Embase (OVID) |
|---------------|--------|-----------|---------------|
| 3-6,<br>14-23 | [tiab] | :ti,ab,kw | .ti,ab,kw.    |
