# Supplementary material for: Dietary Liberalization in Tetrahydrobiopterin-Treated PKU Patients: Does It Improve Outcomes?
Source: Nutrients. 2022 Sep 19;14(18):3874. doi: 10.3390/nu14183874 (PMC9504284; doi:10.3390/nu14183874)
Supplement: Supplementary file 1 [file nutrients-14-03874-s001.zip]

Archive with 9 entries (9 files):
- Supplementary file S1 - PRISMA checklist.doc.pdf
- Supplementary file S2 - Search details.pdf
- Supplementary file S3 - Meta-analyses.pdf
- Supplementary file S4 - Forest plot of primary meta-analyses.pdf
- Supplementary file S5 - Excluded studies - origineel.pdf
- Supplementary file S6 - Risk of bias in individual studies.pdf
- Supplementary file S7 - Funnel plots.pdf
- Supplementary file S8 - GRADE ratings.pdf
- Supplementary file S9 - Studies with lower Phe levels.pdf
